# Supplementary material for: RICTOR Affects Melanoma Tumorigenesis and Its Resistance to Targeted Therapy
Source: MDPI journal article supplement (doi:10.3390/biomedicines9101498), 2021-10-19
Supplement: s1 [file s1]

**Figure S1**

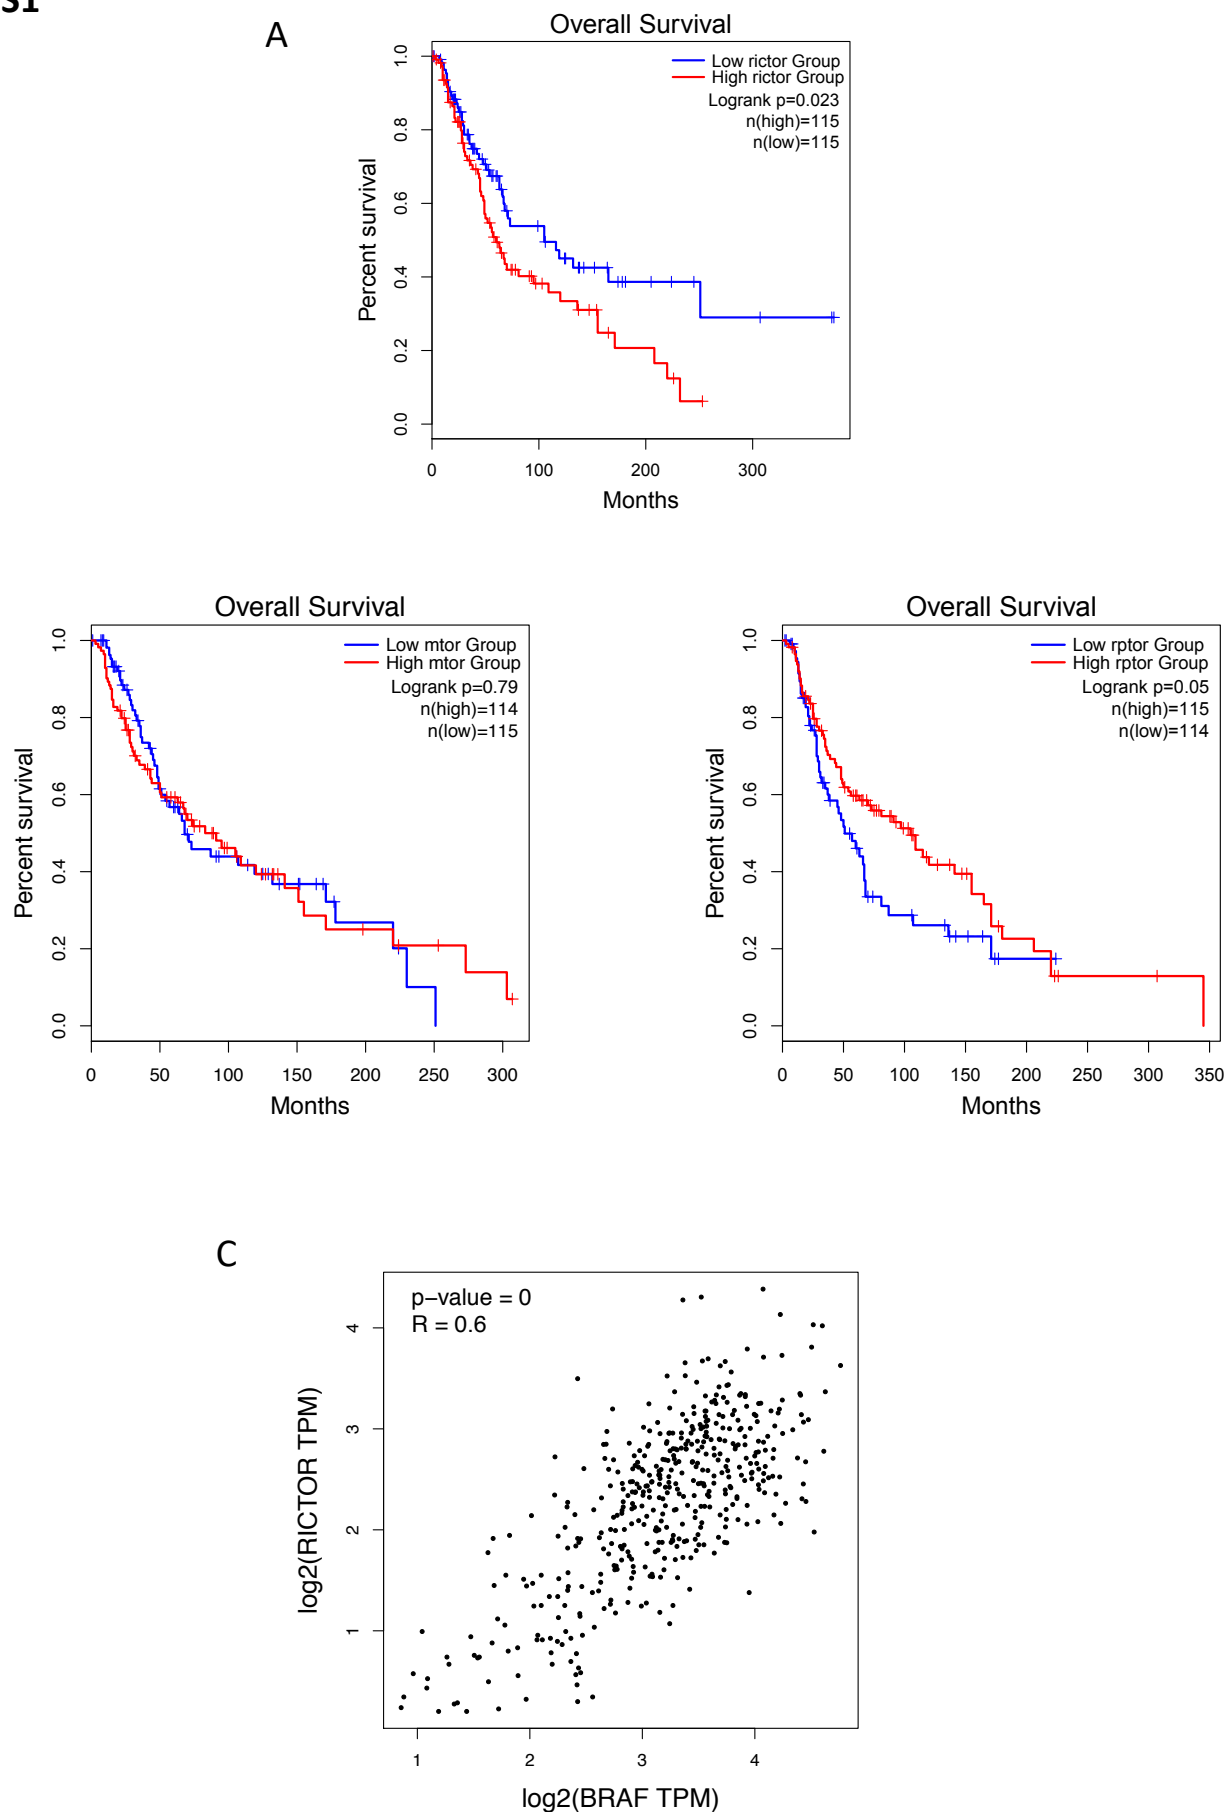

**A** : Survival analysis of melanoma patients (TCGA) stratified by expression of RICTOR. Cohort was split into high versus low RICTOR expression at the 75th percentile. **B** : Survival analysis of melanoma patients (TCGA) stratified by expression of mTOR (Left) or RAPTOR (Right). Cohort was split into high versus low expression at the 75th percentile. **C** : mRNA expression levels for RICTOR and BRAF in human melanoma samples, in which each dot corresponds to one tumor sample. Pearson score ( $R=0.6$ ) shows a positive and significant correlation.

**Figure S2**

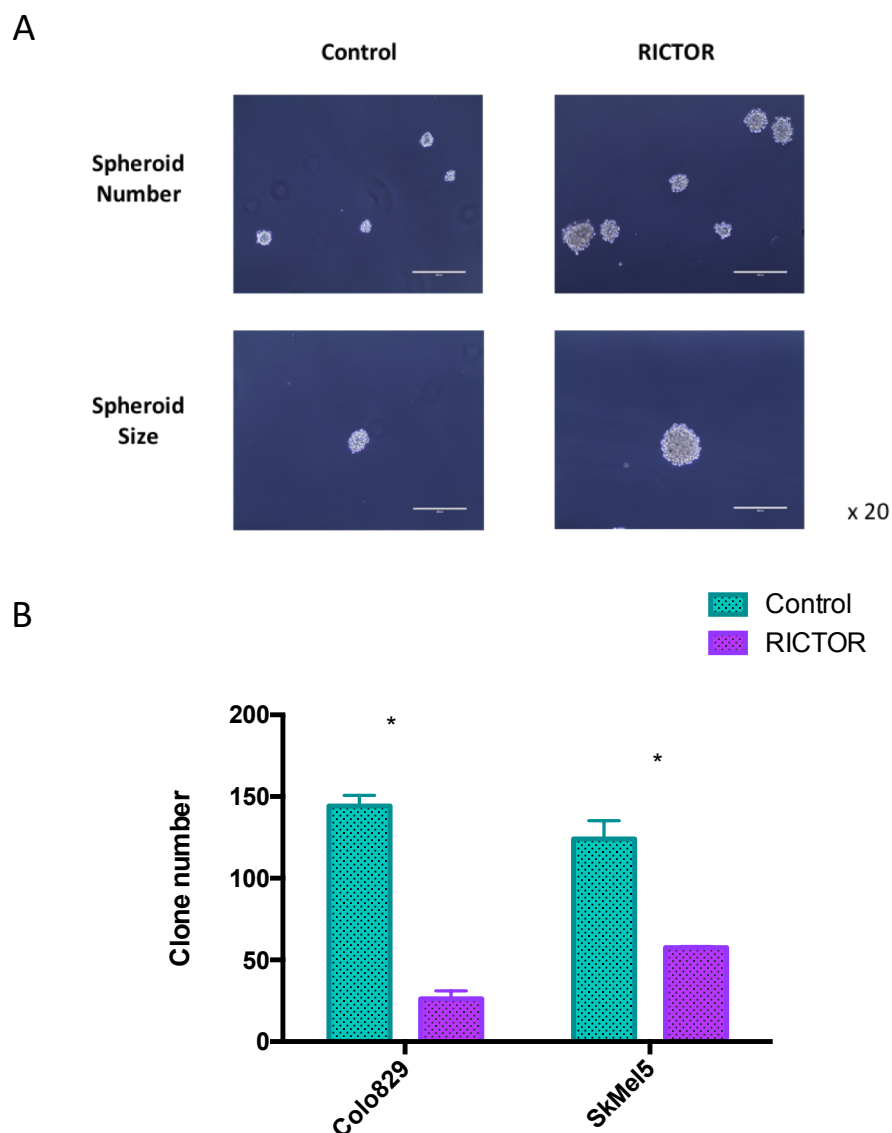

**A** : SkMeI5 melanoma cell lines were transfected with empty vector (Control) or with vector expressing human RICTOR cDNA (RICTOR) and grown as spheroid (3D). Pictures were taken after 10 days, scale bar represents 400µm (top) and 200µm (bottom) to assess spheroid number and size.

**B** : Colo829 and SkMeI5 melanoma cell lines were transfected with empty vector (Control) or with vector expressing human RICTOR cDNA (RICTOR) and selected by resistance to blasticidin. Colonies grown in 2D were counted after 14 days. Graphs represent mean  $\pm$  s.d. of an experiment in triplicate (similar results were obtained in three independent experiments). Significance was calculated using the Student's t test: \*p < 0.05.



**Figure S3**

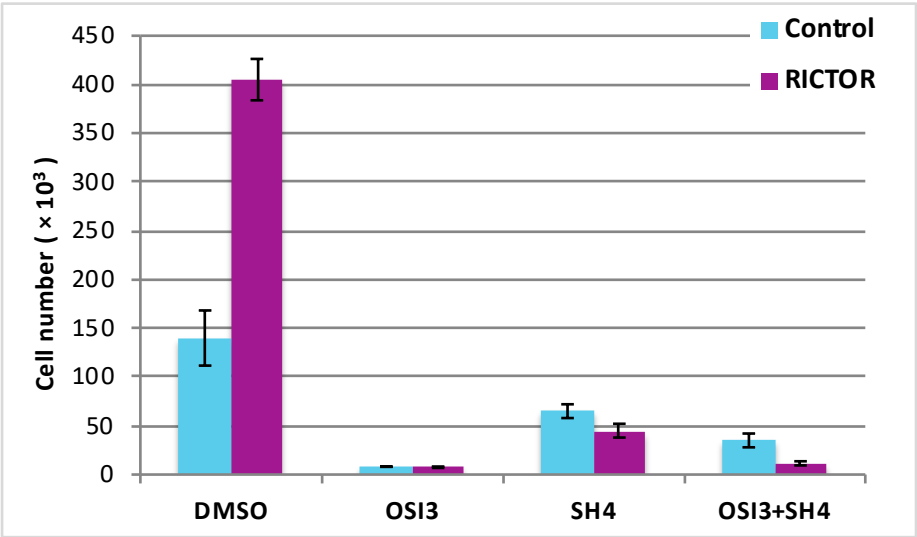

SkMel5 melanoma cell lines were transfected with empty vector (Control) or with vector expressing human RICTOR cDNA (RICTOR) grown as spheroids (3D) and treated with DMSO, OSI-027 1 $\mu$ M, SH4-54 2 $\mu$ M or both treatment combined. Cells were dissociated after 10 days of treatment and counted. Graphs represent mean  $\pm$  s.d. of an experiment in triplicate.

**Figure S4**

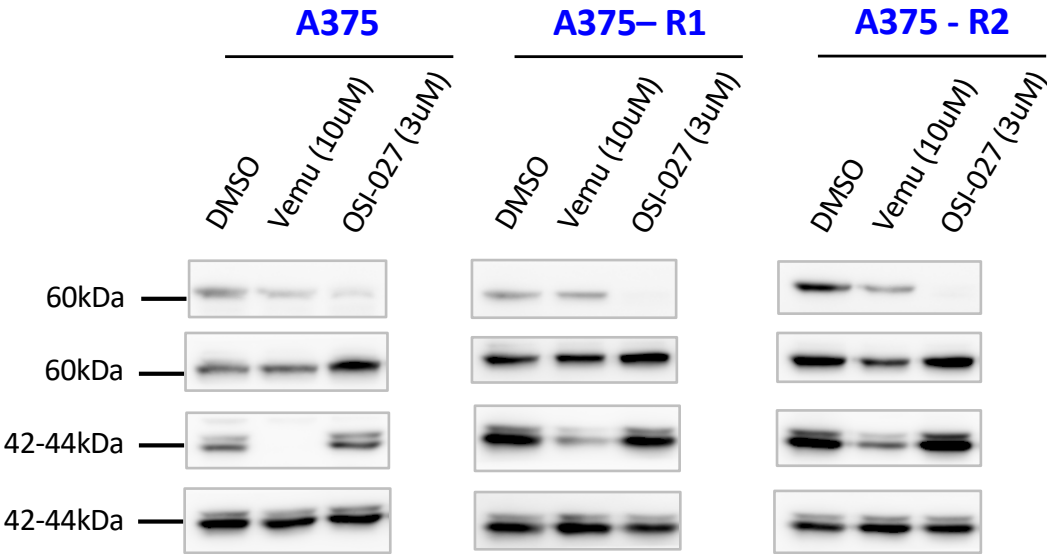

A375 melanoma cell line and A375 Vemurafenib resistant cell lines (A375-R1 and A375-R2) were treated for 1 hour with DMSO, Vemurafenib (10 $\mu$ M) or OSI-027 (3 $\mu$ M) and expression of phosphorylated AKT and ERK and total AKT and ERK were assessed by western blotting.

Figure S5

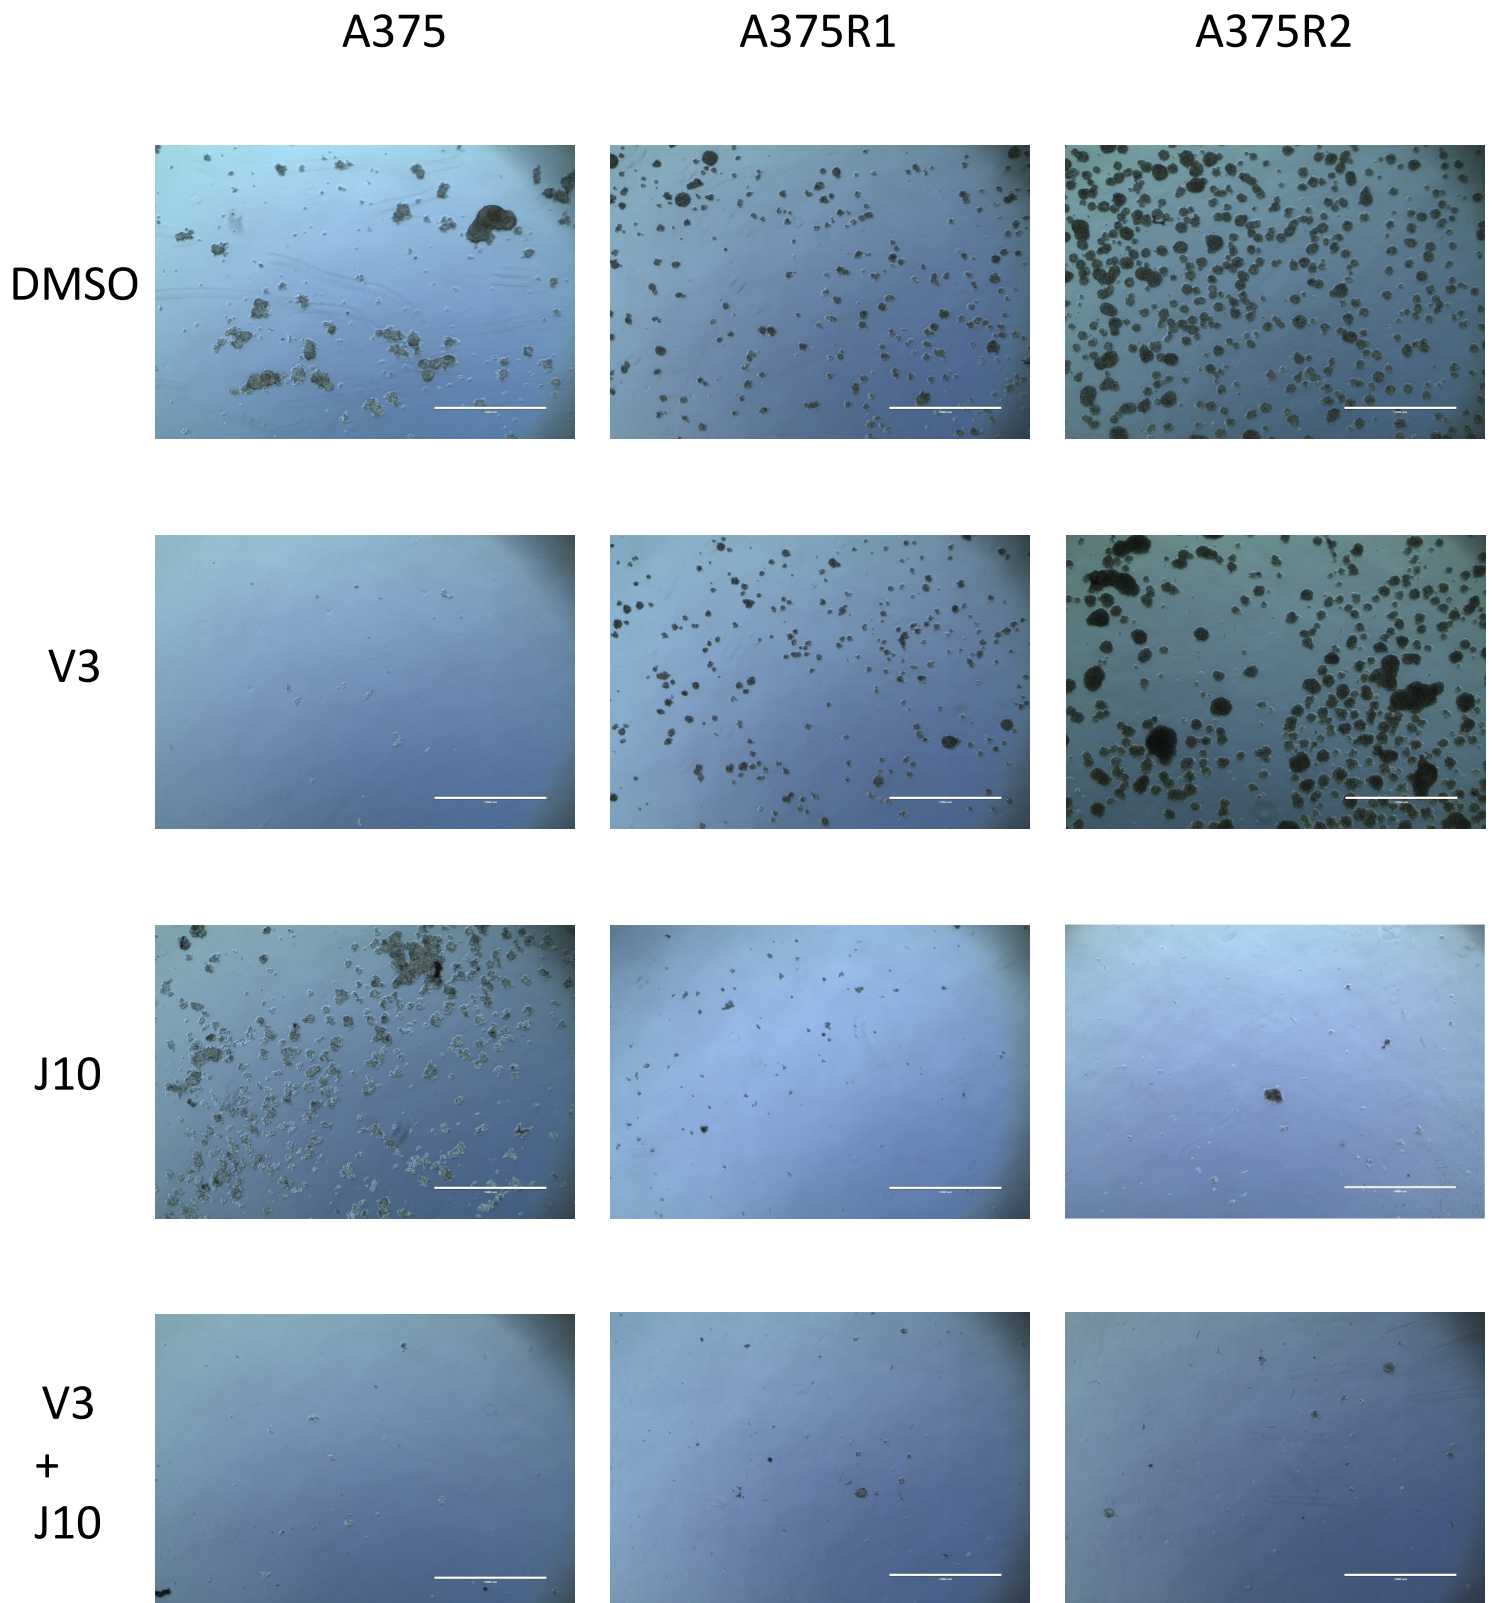

A375 parental and resistant (A375R1, A375R2) cell lines were grown as spheroids (3D) and treated with DMSO, 3 $\mu$ M Vemurafenib (V3), 10 $\mu$ M JR-AB2-011 (J10) or the combination of both (V3+J10) for 10 days. Pictures were taken after 10 days of treatment; scale bar represents 1000  $\mu$ m.

**Figure S6**

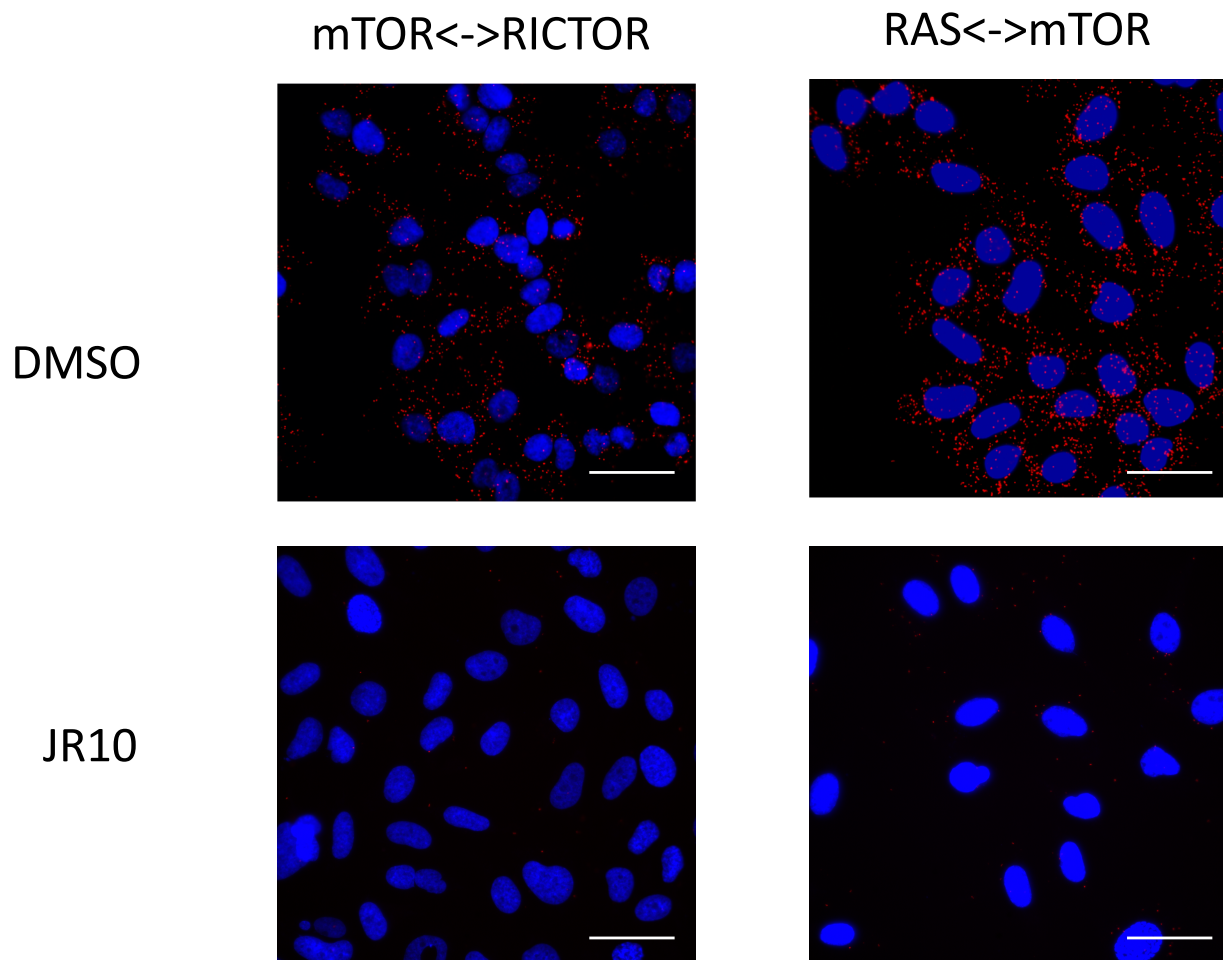

A375-R1 cells grown in 2D were treated with DMSO or 10  $\mu$ M (JR10) of JR-AB2-011 for 24 hrs and RICTOR interactions with mTOR or RAS were detected by in situ PLA. The interactions were visualized as fluorescent red dots. DAPI stained nuclei (blue). Scale bar, 50  $\mu$ m.



Figure S7

Sensitive

Resistant

Patient 3

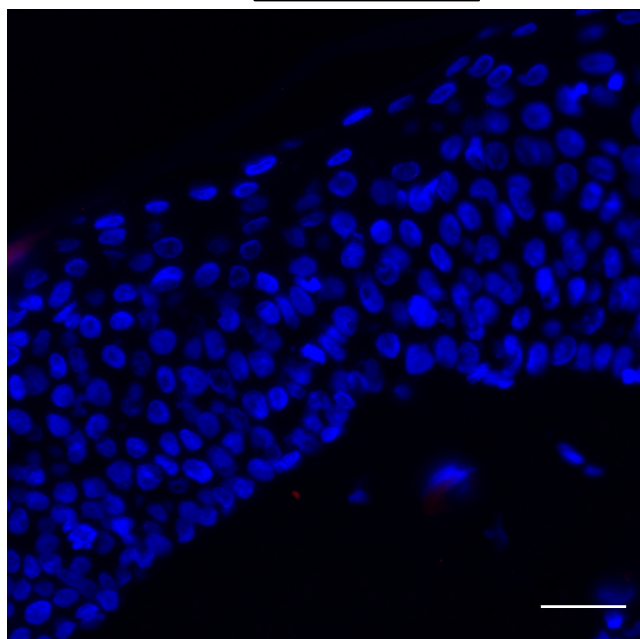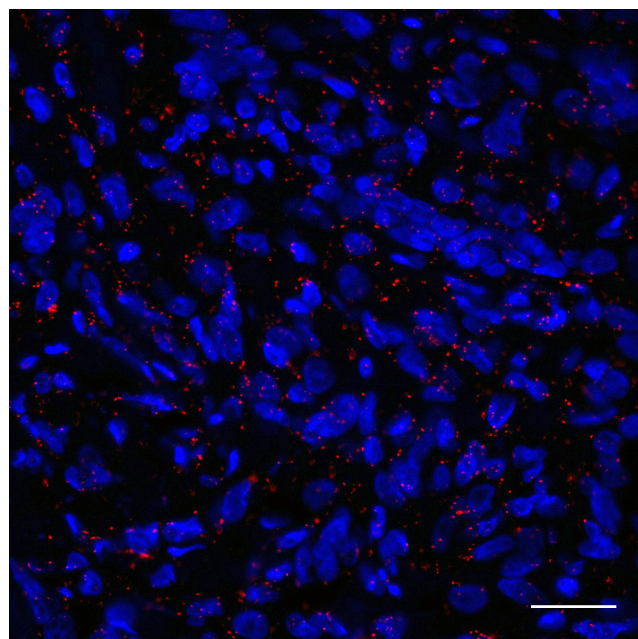

Patient 4

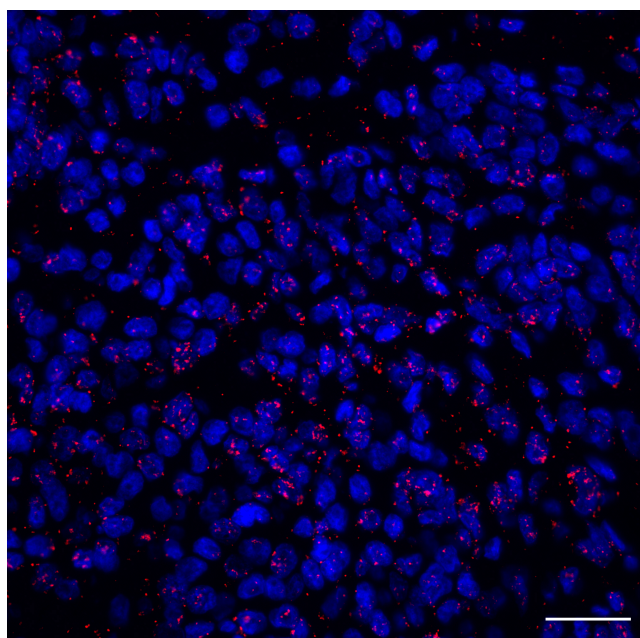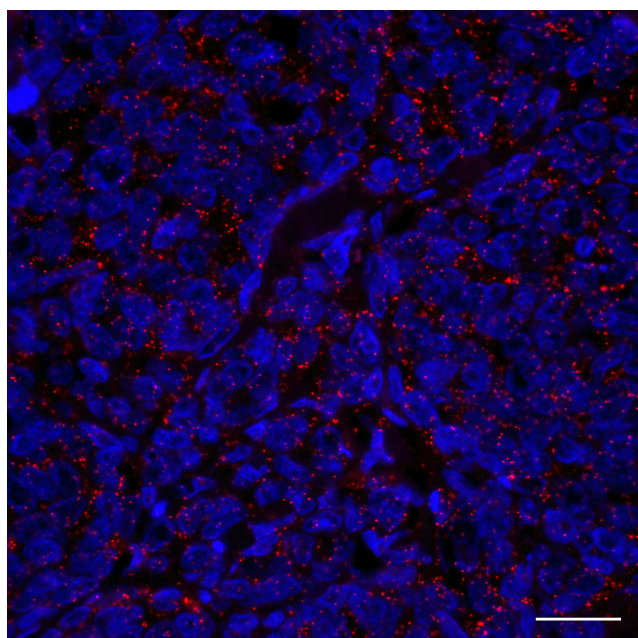

Patient 5

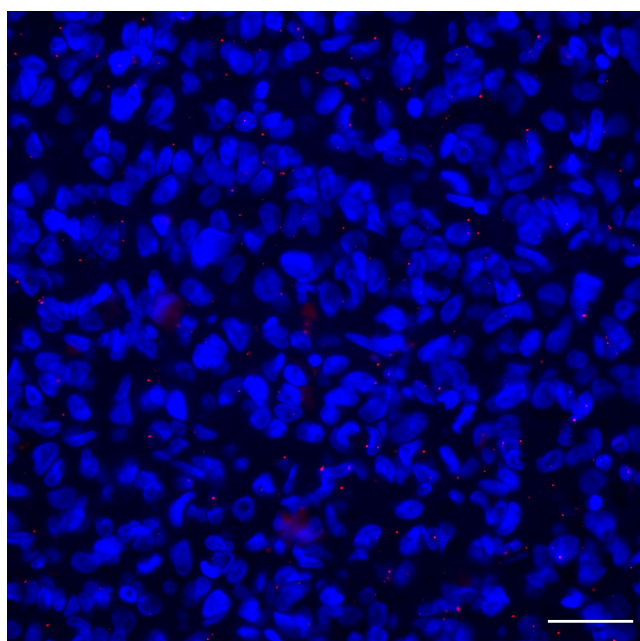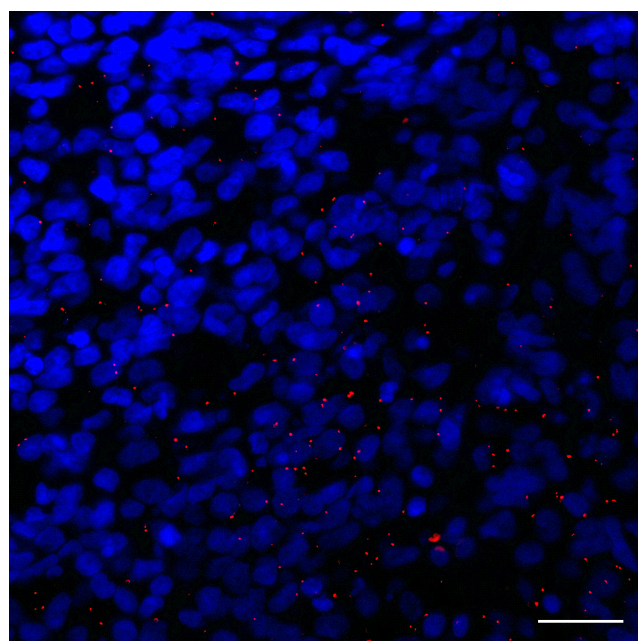

Representative pictures of RAS-RICTOR interactions assessed by in situ PLA (red dots) in paraffin sections of 3 metastatic human melanoma samples before treatment and after resistance occurred. DAPI-stained cell nuclei (blue). Scale bar, 50  $\mu$ m.

Figure S8

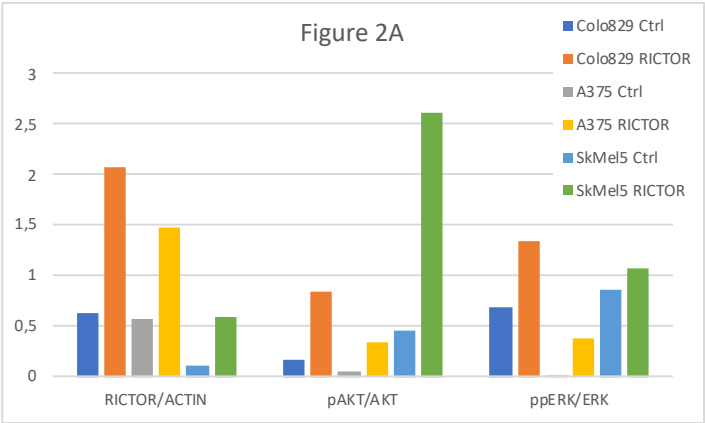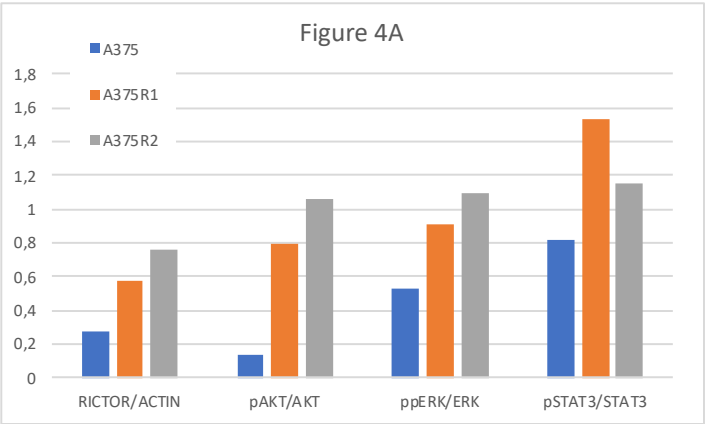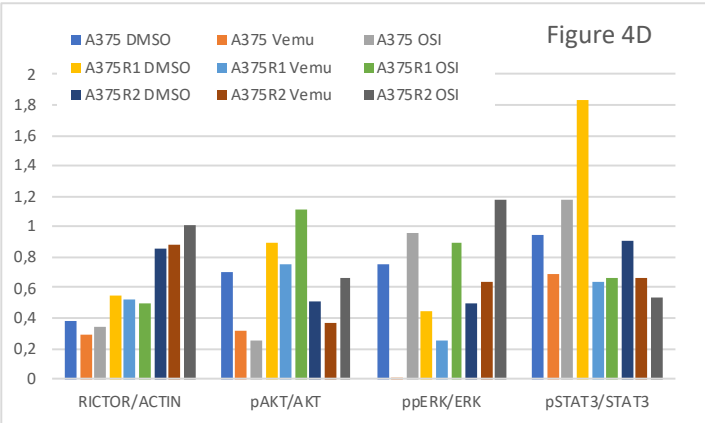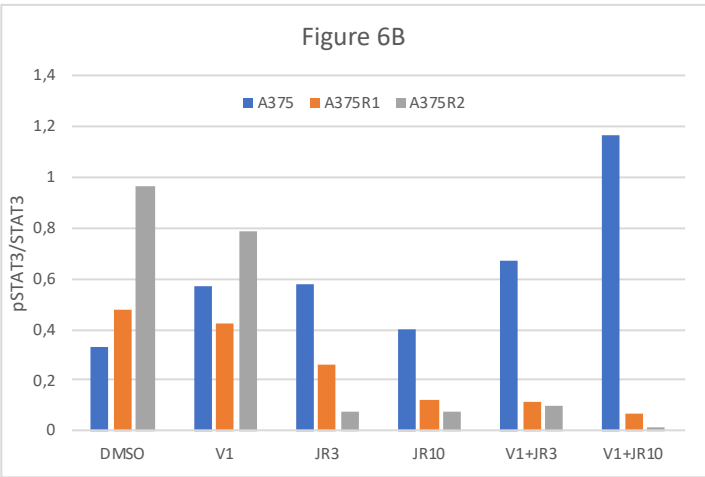

Quantification of the blots from Figures 2A, 4A, 4D and 6B

**Supplementary Table S1**

| Patients | Firts line of Therapy |            |            | Biopsy before treatment                |            | Biopsy at resistance                |            |
|----------|-----------------------|------------|------------|----------------------------------------|------------|-------------------------------------|------------|
|          | Inhibitors            | Beginning  | End        | Location                               | Date       | Location                            | Date       |
| 1        | Dabrafenib+Trametinib | 19/10/2012 | 21/04/2015 | Right inguinal lymph node <sup>§</sup> | 16/09/2011 | Right iliac lymph node <sup>§</sup> | 29/08/2014 |
| 2        | Dabrafenib+Trametinib | 20/02/2015 | 27/07/2015 | Left ear*                              | 20/02/2015 | Left ear <sup>§</sup>               | 15/11/2016 |
| 3        | Dabrafenib+Trametinib | 11/07/2016 | 11/10/2017 | Right breast <sup>§</sup>              | 24/05/2016 | Thorax <sup>§</sup>                 | 11/10/2017 |
| 4        | Dabrafenib+Trametinib | 12/04/2019 | 16/08/2019 | Left iliac lymph node <sup>§</sup>     | 12/04/2019 | Liver <sup>§</sup>                  | 16/08/2019 |
| 5        | Dabrafenib+Trametinib | 24/11/2017 | 29/05/2018 | Right inguinal lymph node <sup>§</sup> | 17/11/2017 | Right iliac lymph node <sup>§</sup> | 15/05/2018 |

\*primary tumor ; <sup>§</sup>Metastatic tumor
